# Supplementary material for: Mechanical interactions between tissue layers underlie plant morphogenesis
Source: Research Square preprint supplement (doi:10.21203/rs.3.rs-4536561/v1), 2024-07-03
Supplement: Supplementary file 1 [file 40336173e91aad3bdb253880.pdf]

# EXTENDED DATA

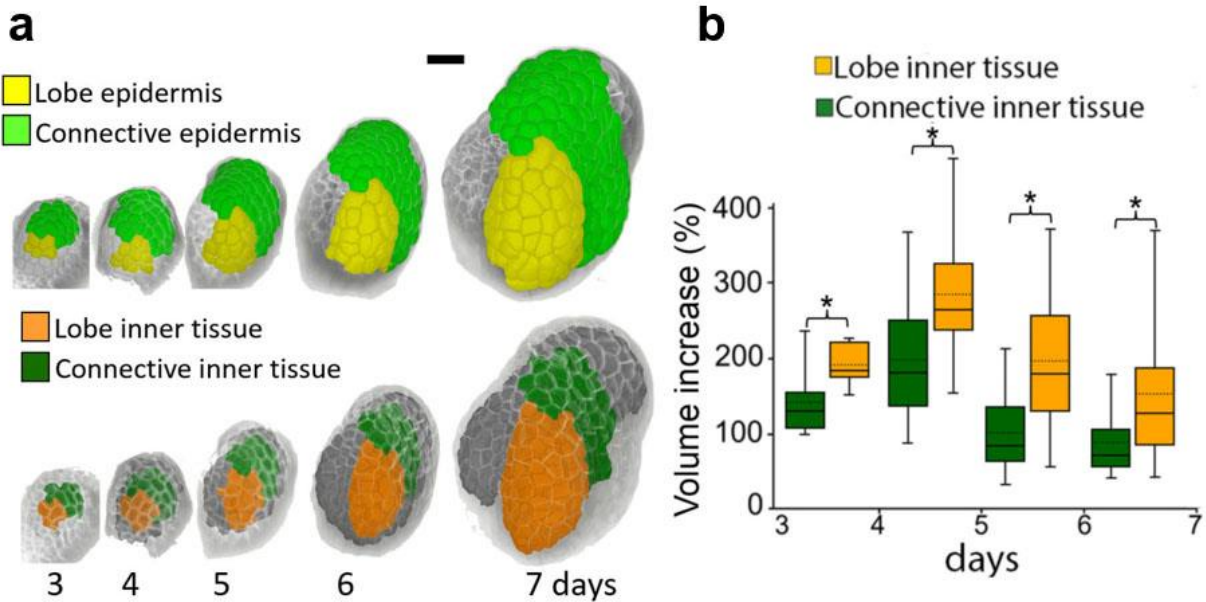

**Extended Data Fig. 1 Localized growth in inner tissue underlies lobe formation.** **a**, Lineage tracing of the anther regions, used for quantifications of growth shown. Colors indicate regions defined at the last time point traced back to the initial time point. **b**, Quantification of normalized volume increase per anther region in internal tissue ( $n > 50$  cells at each time point, 4 time-lapse series). Data was normalized by the mean growth in the connective region. Asterisks indicate statistical significance, Mann-Whitney U test,  $P < 0.01$ . Scale bar, 20  $\mu\text{m}$ .

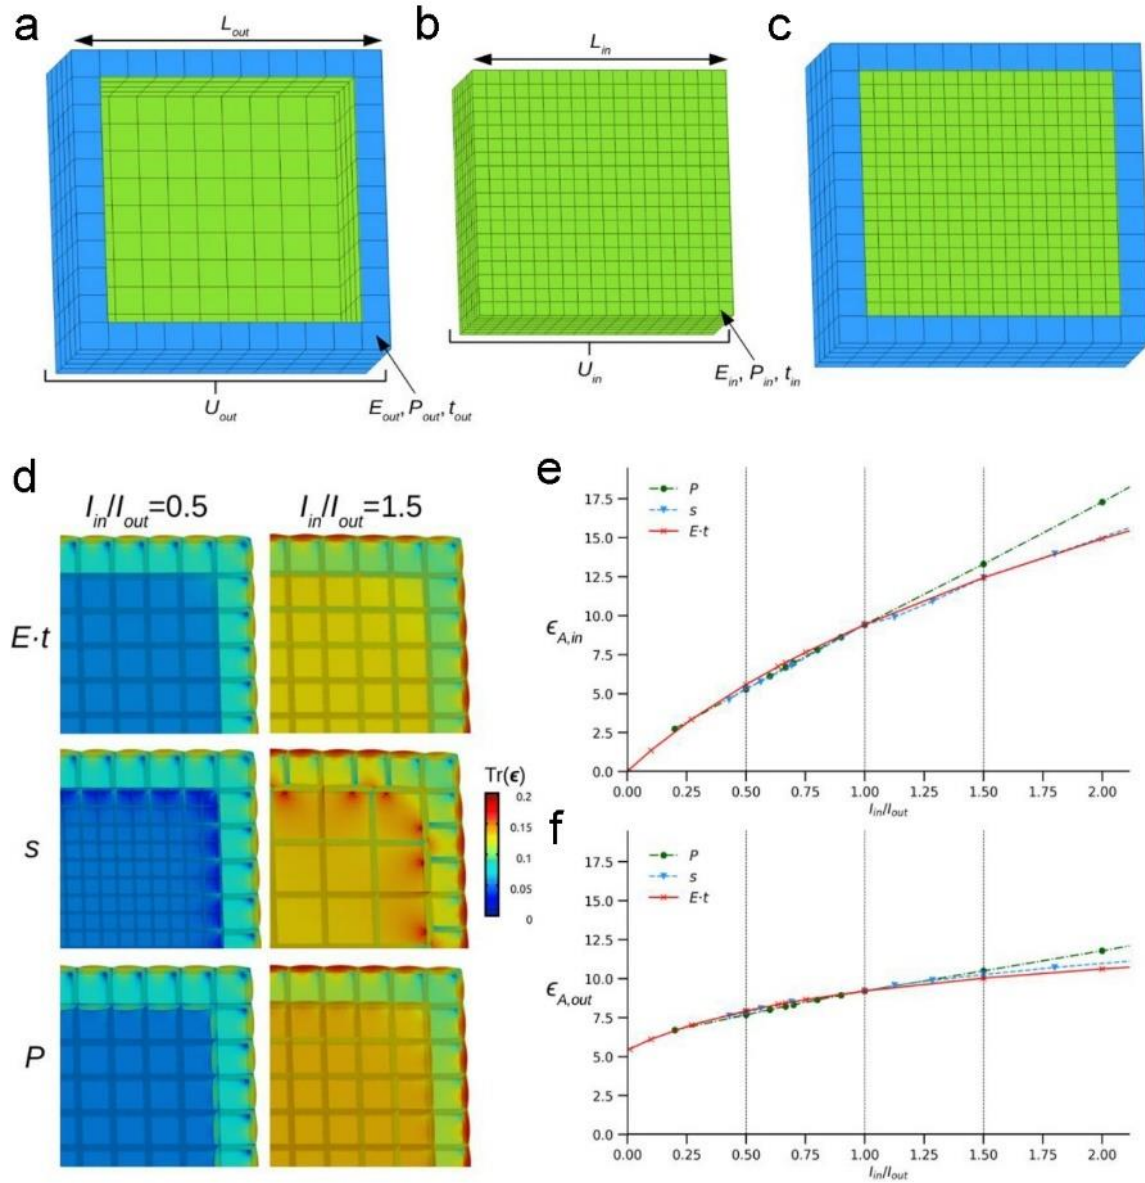

10

11 **Extended Data Fig. 2 Cube of cube model details.** **a** to **c**, Cross-section of the model template of the cube of cubes.  
 12 **a**, Outer layer of the tissue with constant properties. It is of total size  $L_{out}=U_{out}l_{out}$  where  $U_{out}$  is the number of cells  
 13 along the side of the cubic tissue and  $l_{out}$  the side of those cells. **b**, Inner tissue of total size  $L_{in}=(U_{out}-2)l_{out}$ . It is made  
 14 of  $U_{in} \times U_{in} \times U_{in}$  cells of size  $l_{in}=L_{in}/U_{in}$ . **c**, Assembled outer layer and inner tissue. **d**, Detailed view of Fig. 2B. The  
 15 trace of the strain tensor is displayed as a heatmap. (**e** and **f**) For each parameter  $E \cdot t$ ,  $s$ , and  $P$ , areal strains (in %) of  
 16 anticlinal walls within inner **e** and outer **f** cells are plotted against the ratio of inflation potential in inner vs outer cells.

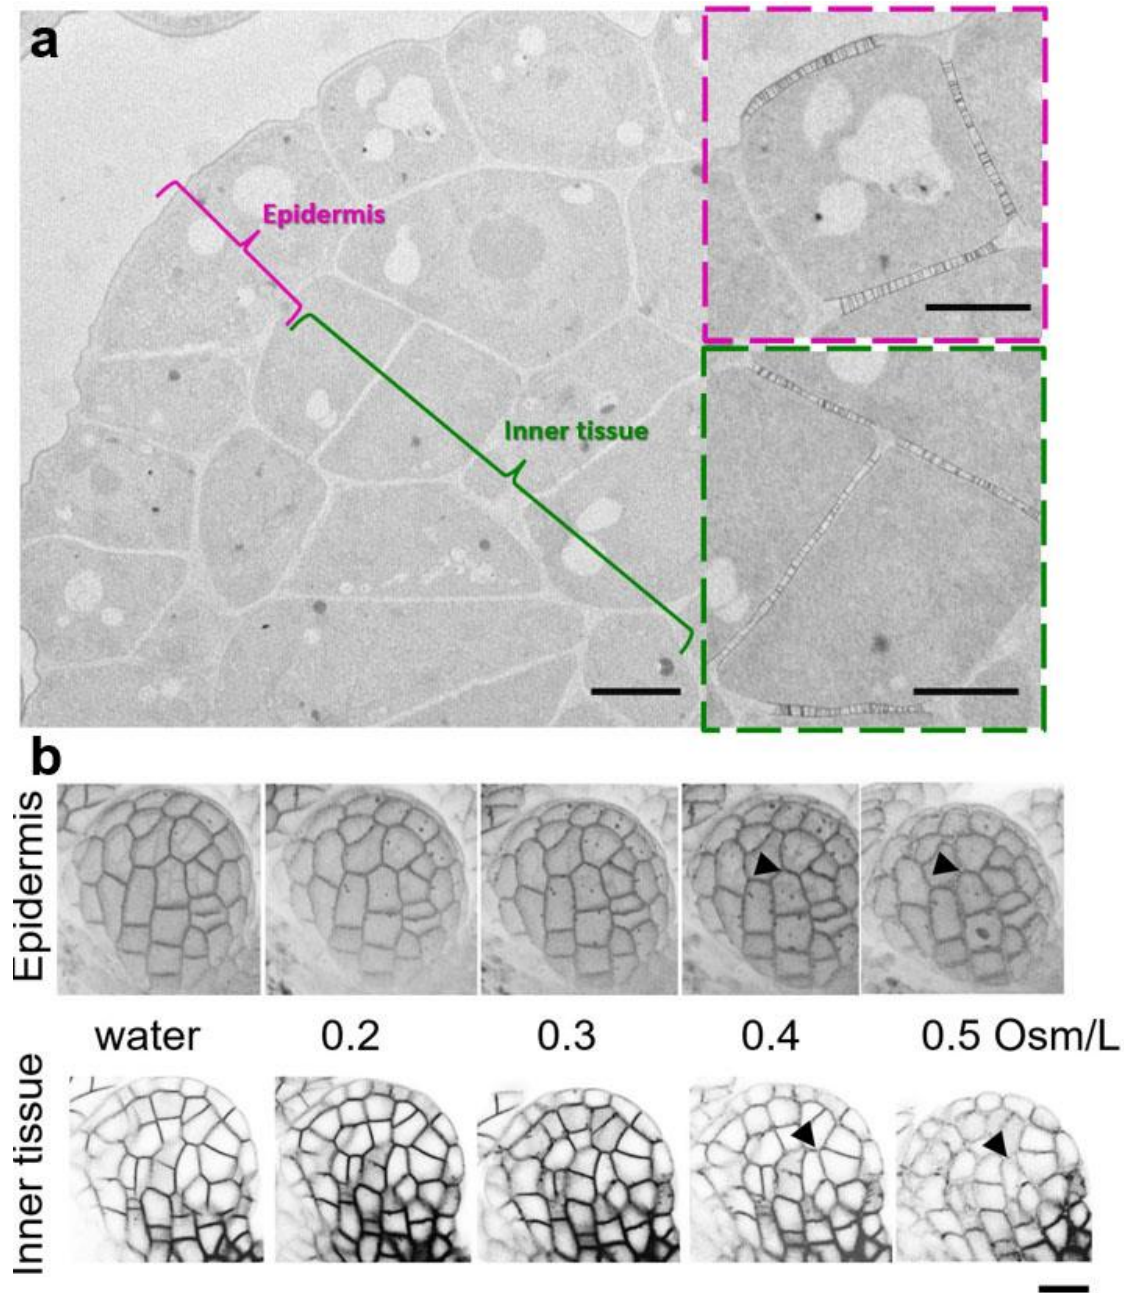

**Extended Data Fig. 3 Measurements of cell wall thickness and Incipient plasmolysis analysis in ~4 days old anthers.** **a**, Representative transmission electron microscopy micrograph of an anther lobe at a stage before lobation. Brackets indicate the layers considered for measurements as shown in Fig. 2e, epidermis (magenta) and inner tissue (green). Insets show segmented lines used to quantify cell wall thickness shown in Fig. 2f. **b**, Confocal images of anthers, before and after osmotic treatment with solutions of increasing NaCl concentration. The top row shows epidermis while the bottom row shows digital cross sections in the inner tissue. Arrow heads indicate the interstitial spaces created at incipient plasmolysis. Scale bars, 2.5  $\mu\text{m}$  (a), 10  $\mu\text{m}$  (b)

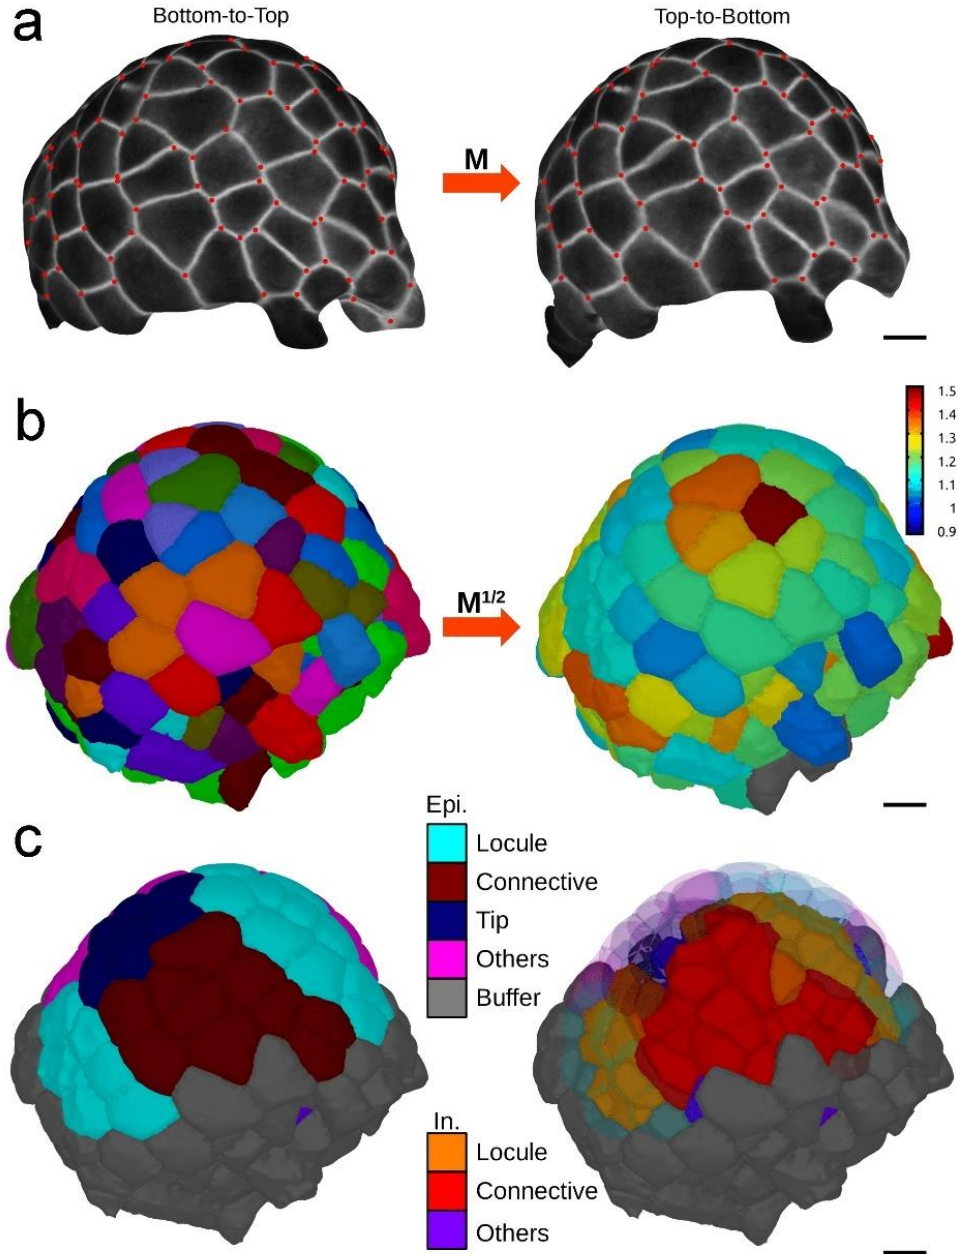

25

26 **Extended Data Fig. 4 Obtaining the starting mesh for stiffness reverse-engineering.** **a**, 2D meshes extracted from  
 27 the top-to-bottom and bottom-to-top confocal microscopy scans of the same plasmolyzed sample Cell junctions are  
 28 highlighted in red. We compute the transformation from one 3D point cloud to the other,  $M$  **b**, Starting mesh and  
 29 transformed mesh obtained by applying half the transformation  $M^{1/2}$  to the former. The heatmap of volume increase  
 30 of each cell from the plasmolyzed experimental state to the turgid. **c**, Pooling of cells into regions. Regions are based  
 31 on layer, connectivity and volume increase displayed in **b**. Scale bars, 5  $\mu\text{m}$ .



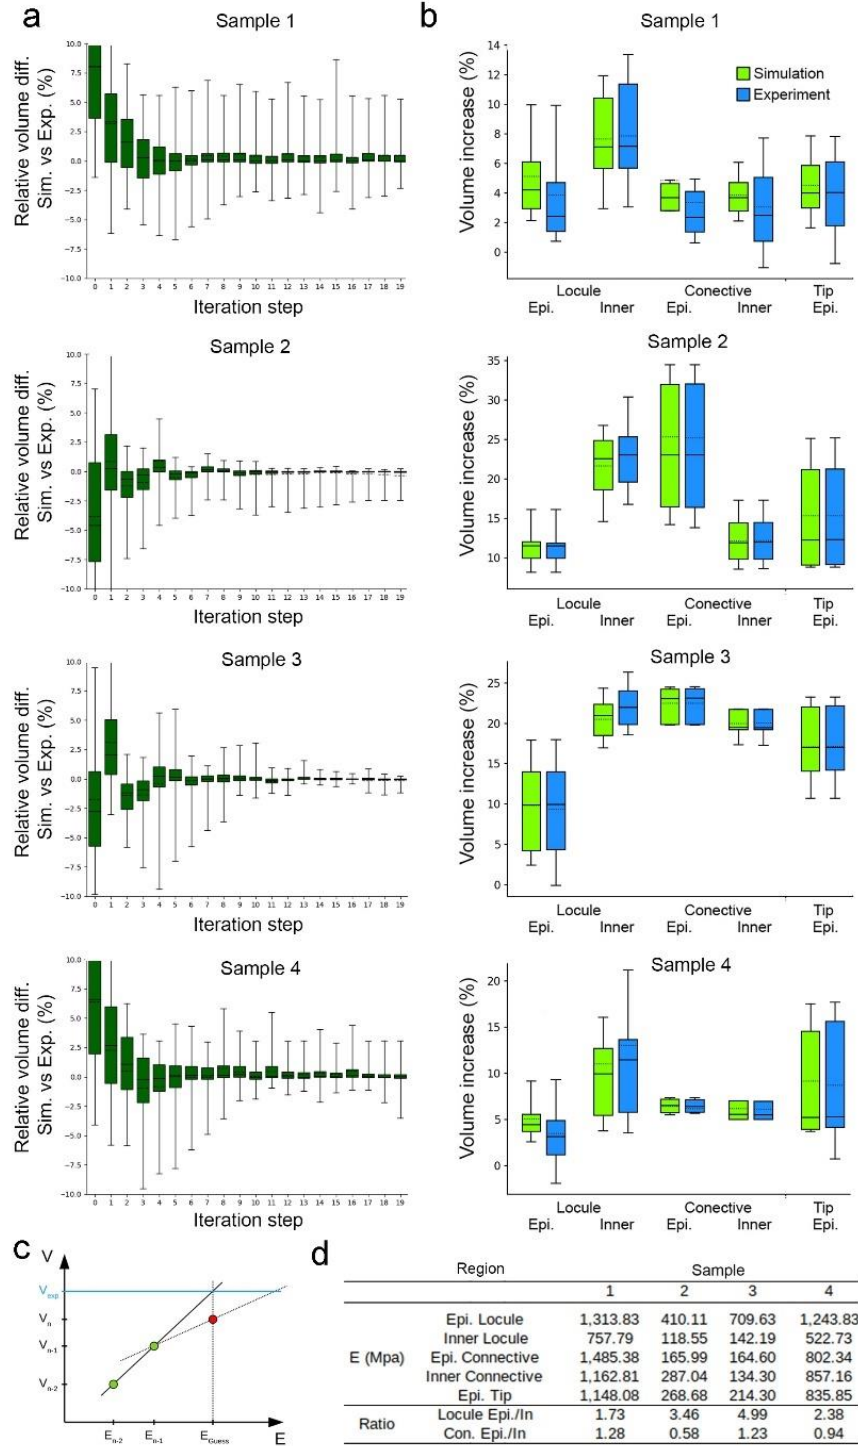

32

33 **Extended Data Fig. 5 Convergence of reverse engineering and significance of results.** **a**, Convergence of the  
 34 volume distribution of all cells of each sample over the reverse engineering steps. **b**, For each sample: final volume  
 35 increase distributions from the plasmolyzed state to the turgid state, simulated and experimental. **c**, Guessing of the  
 36 next stiffness of a given cell. A linear trend is drawn from the two previous states ( $E_{n-2}, V_{n-2}$ ) and ( $E_{n-1}, V_{n-1}$ ), and the  
 37 intersection between this line and the  $V=V_{exp}$  horizontal line yields the new cell stiffness  $E_{Guess}$ . **d**, Stiffness values  
 38 after the 20th reverse engineering step per region and stiffness ratios between regions of interest. An inner/outer  
 39 gradient can be observed for each sample in the locule region.

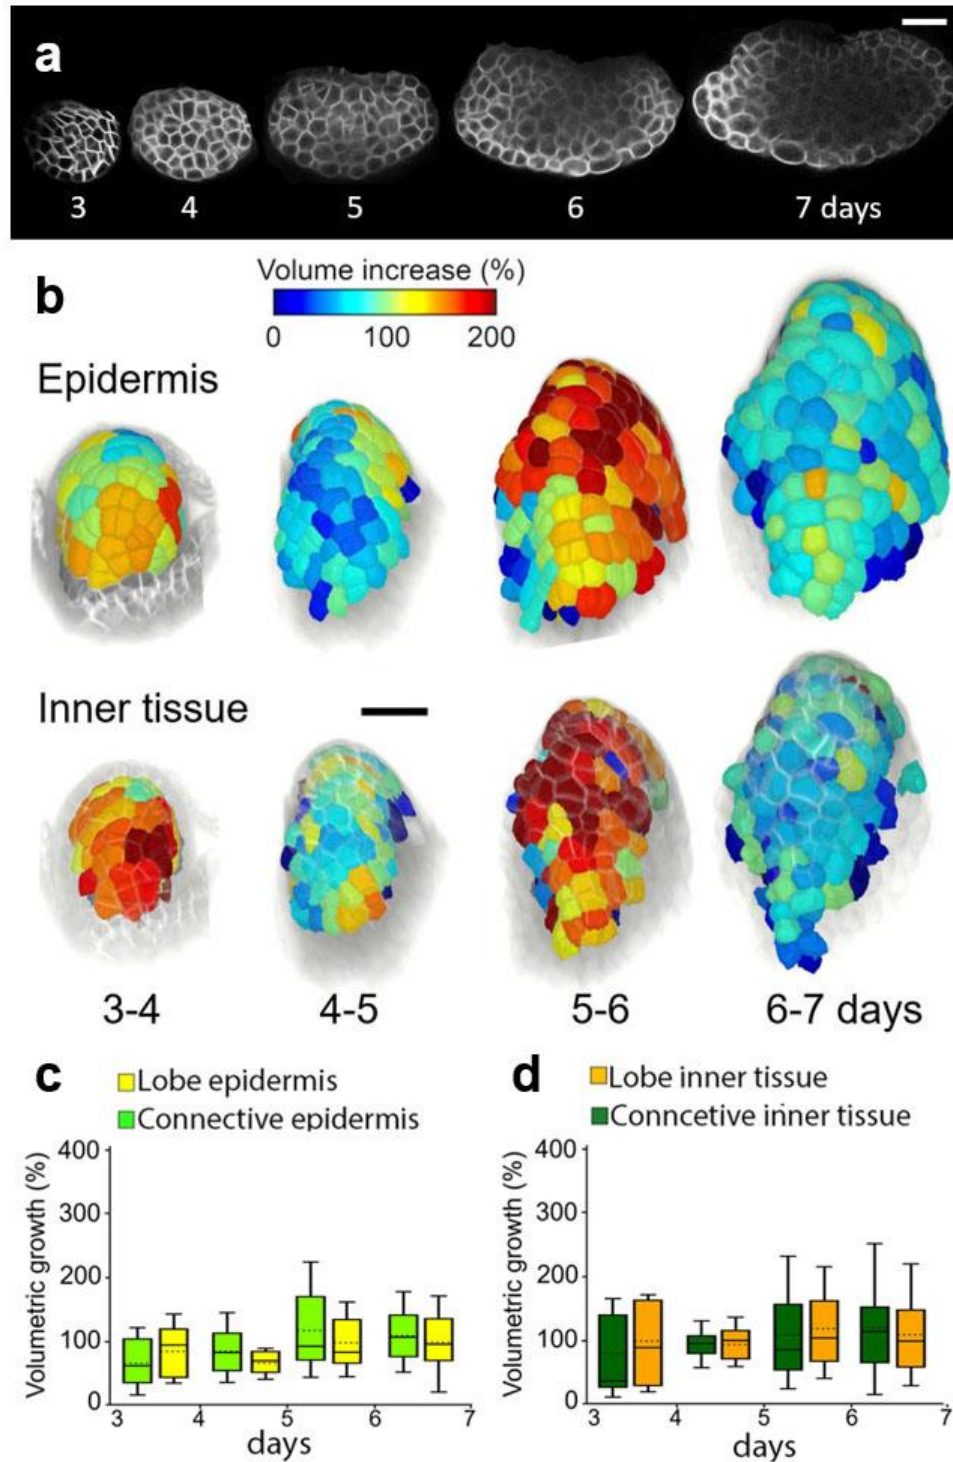

40

41 **Extended Data Fig. 6 Lobe development is abolished in the absence of localized internal growth in the locule.**

42 **a**, Digital cross sections of a time-lapse series of the developing *spl-1* anther. **b**, Heat maps of volume increase in  
 43 anther epidermis and inner tissue. **c** and **d**, Quantification of volume increase per anther region in the epidermis and  
 44 inner tissue. No statistical significance, Mann-Whitney U test,  $P < 0.01$  ( $n > 50$  cells) was detected. Scale bars, 20  $\mu\text{m}$   
 45 (a and b).

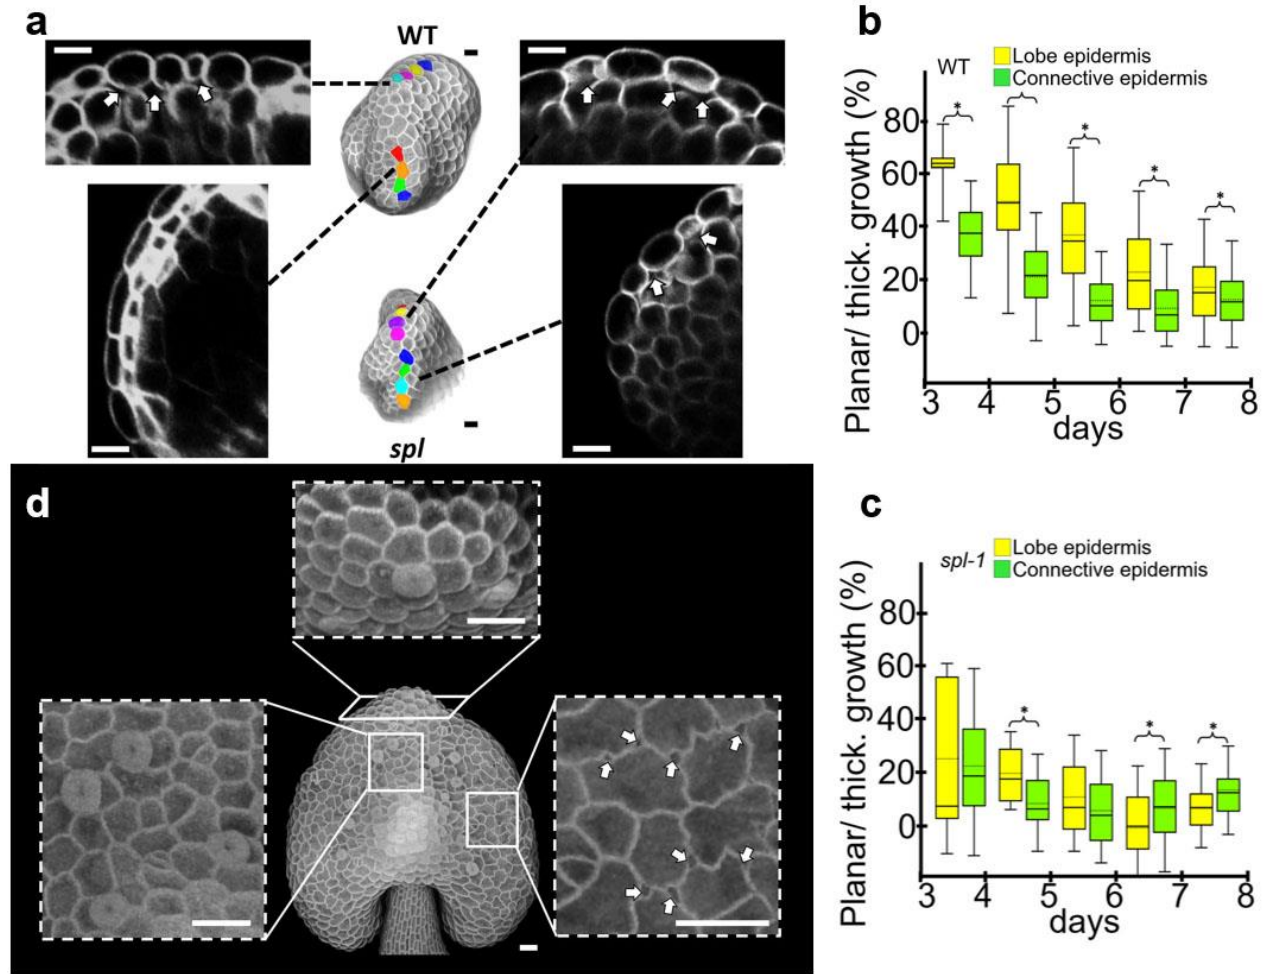

**Extended Data Fig. 7 The epidermis in the anther lobe is under local tension** **a**, Digital longitudinal cross sections of the anther lobe (top) and tip of connective (bottom) for wild type (left) and *spl/nzz* (right). Arrows indicate intercellular spaces. **b** and **c**, Quantification of ratio between cell growth within the organ plane and growth in cell thickness, per anther region in the epidermis in wild type **b**, and *spl-1* **c**. Asterisks indicate statistical significance, Mann-Whitney U test,  $P < 0.01$  ( $n > 50$  cells). **d**, Confocal images of dissected *qua2-1* mutant anther. Insets show details of mid connective (left), tip of connective (top), and lobe (right). Arrows indicate points of cell detachments in the epidermis. Scale bars, 10  $\mu\text{m}$  (a) 20  $\mu\text{m}$  (d).

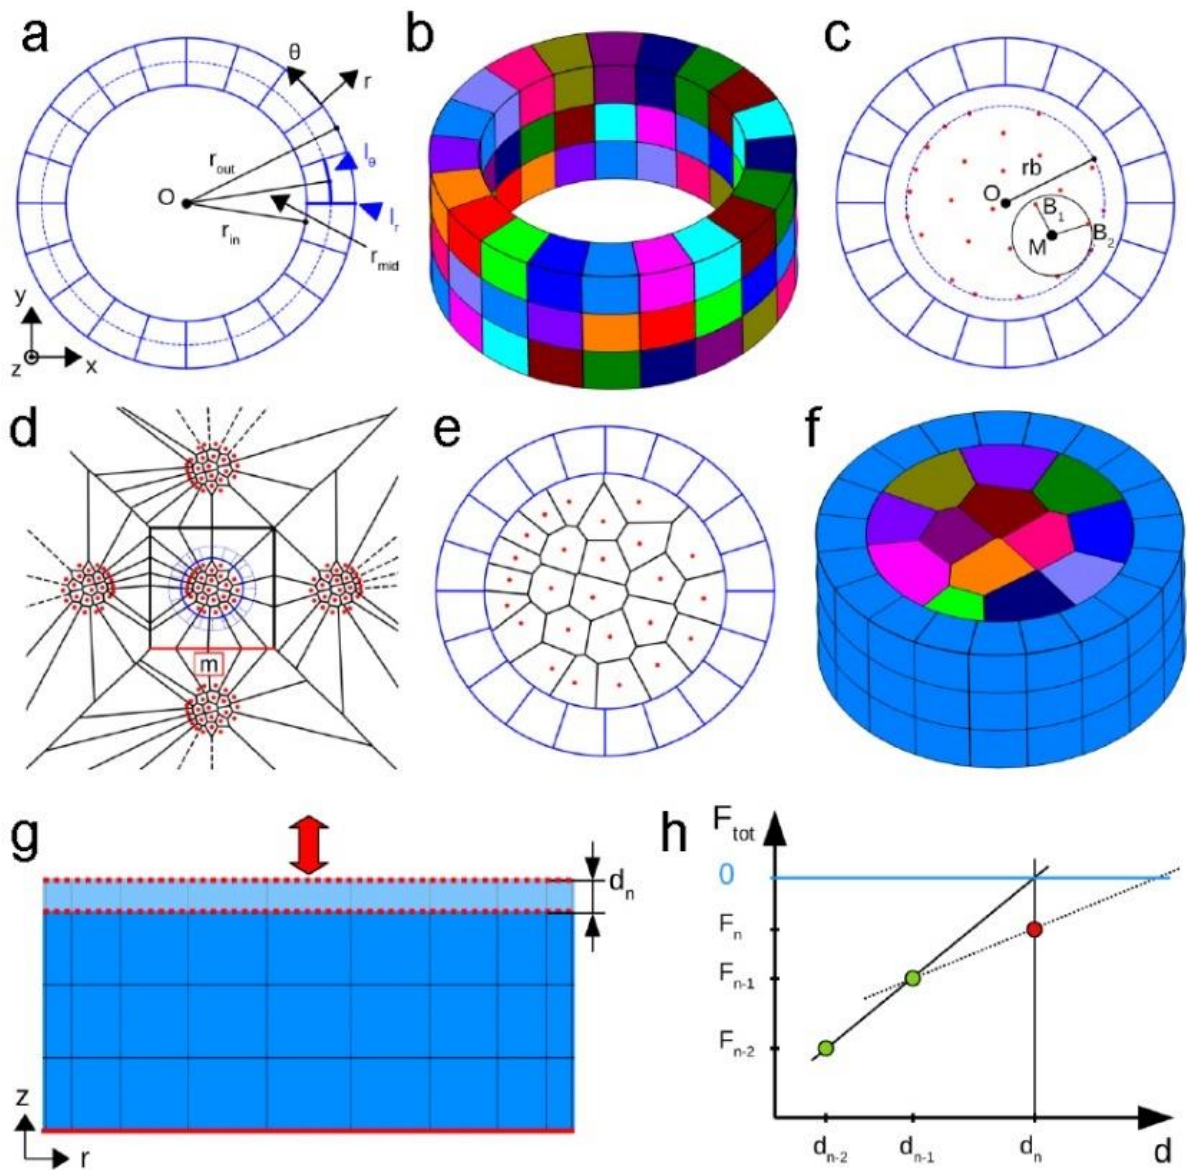

54

55 **Extended Data Fig. 8. Cylindrical Voronoï construction and simulation.** **a**, Construction of the cylindrical  
56 epidermis. **b**, 3D view of the cylindrical epidermis. **c**, 2D simplified schematic of the spring network used to place the  
57 Voronoï diagram control points within the epidermis. **d**, Symmetries of the cloud point and Voronoï diagram  
58 generation. **e**, Final Voronoï diagram. **f**, 3D view of a cylindrical Voronoï model. **g**, Side view of the model.  
59 Continuous red line indicates immobile vertices along the  $z$  axis. Dotted red line indicates the mobile plane that will  
60 adjust the axial force the model is subjected to.  $d_n$  is the current displacement of that plane. **h**, Estimation of the next  
61 displacement  $d_n$  based on the previous steps  $(d_{n-2}, F_{n-2})$  and  $(d_{n-1}, F_{n-1})$  shown as green dots and the goal force of 0 N.  
62 The new state  $(d_n, F_n)$  is represented as the red dot.



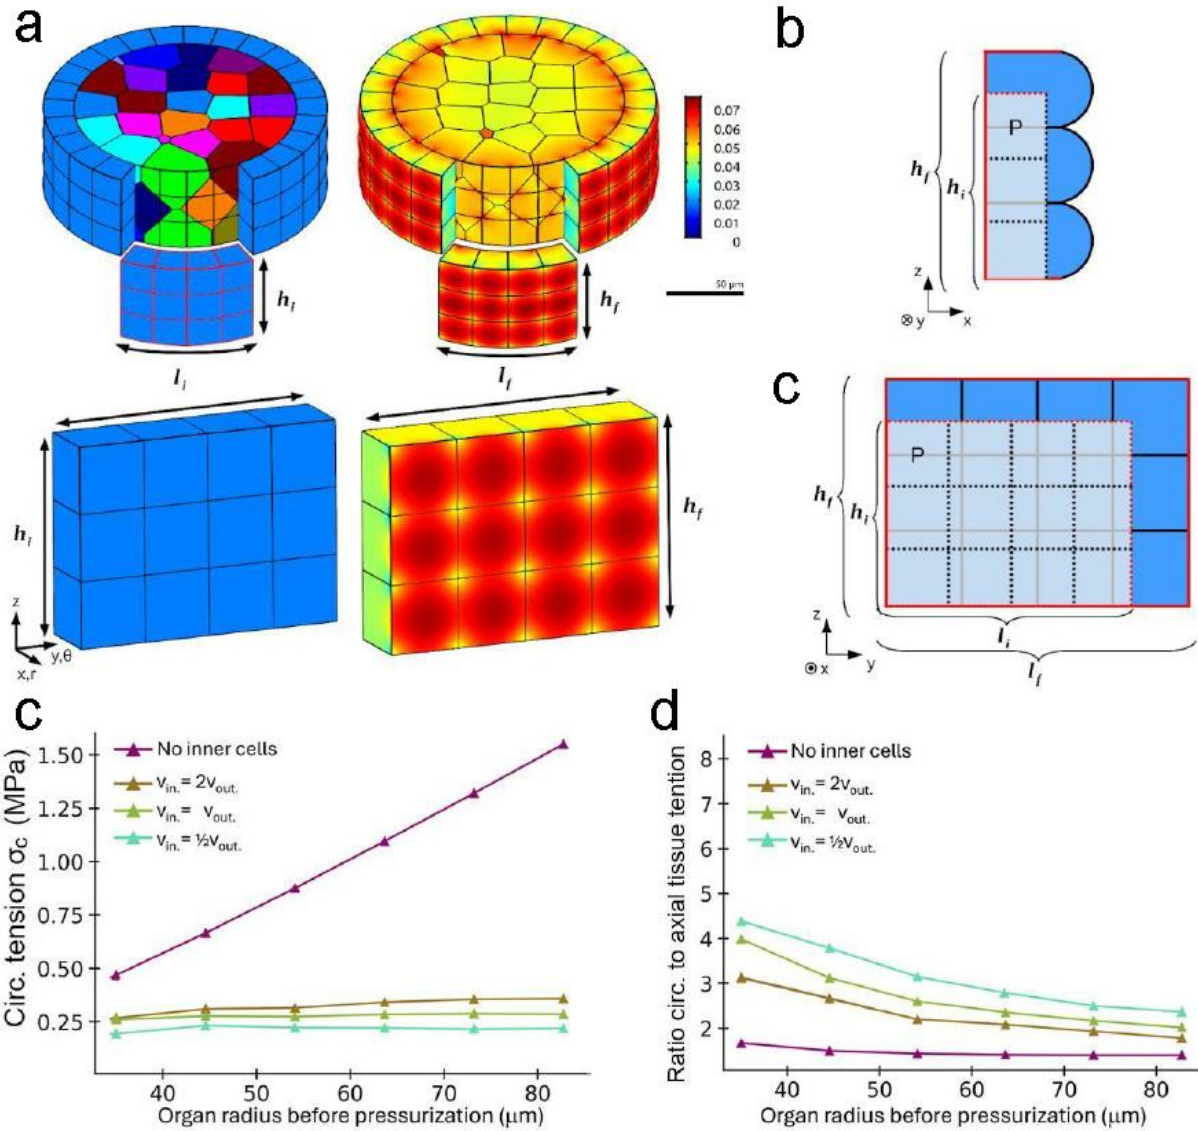

**Extended Data Fig. 9 Construction of the flat twin model for the epidermis.** **a**, Left side: Initial states of the voronoi in ring model and of the corresponding flat twin. Right side: Final states after pressurization. The color corresponds to the trace of the strain tensor. **b** and **c**, Superpositions of the initial and final simulation states of the flat twin model in the xz and yz planes respectively. The cell walls marked in red remain flat due to boundary conditions. The same walls in the yz plane are also moved to match the stretching of the epidermis. **d**, Tissue circumferential tension for varying inner over outer inflation potential ratios plotted against the organ radius before pressurization. **e**, Ratio of the tissue circumferential tension over the tissue vertical tension, plotted against the organ radius before pressurization.

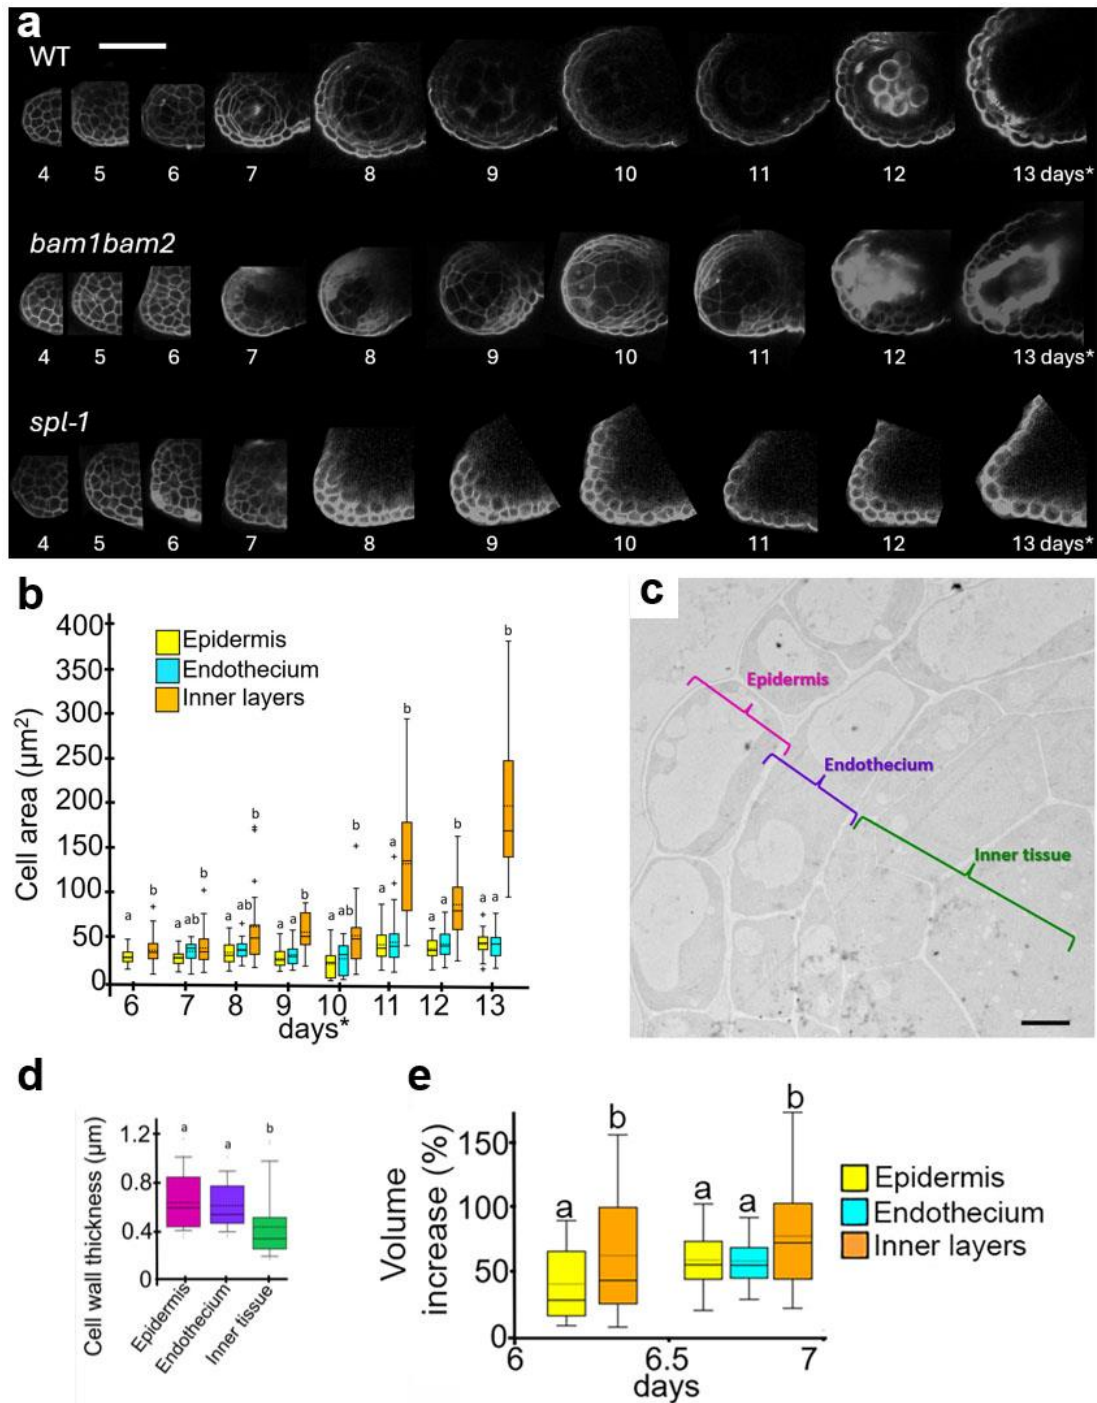

72

73 **Extended Data Fig. 10 Emergence of endothecium reduces tension in the epidermis** (a) Representative digital  
 74 cross-sections of the anther lobe region in WT, *bam1bam2*, and *spl-1* from around 3 to 13 days\*. Asterisk indicates  
 75 estimated days after initiation. (b) Quantification of cell area per lobe region in WT anthers. For each time-point  
 76 different letters indicate statistical significance, Mann-Whitney U test,  $p < 0.01$  ( $n > 10$  cells). Asterisk indicates  
 77 estimated days after initiation. (c) Example of transmission electron microscopy micrograph of an anther lobe after  
 78 "butterfly" shape acquisition. Brackets indicate the layers considered for measurements. (d) Quantification of cell wall  
 79 thickness in different layers of the lobe. Different letters indicate statistical significance, Mann-Whitney U test,  $p < 0.01$   
 80 ( $n > 12$  cells). Asterisk indicates estimated days after initiation. (e) Different letters indicate statistical significance,  
 81 Mann-Whitney U test,  $p < 0.01$ . ( $n > 50$  cells, 4 time-lapse series). Scale bar, 40  $\mu\text{m}$  (a) 2.5  $\mu\text{m}$ . (b)
